# Supplementary figures and images for: Anti-Inflammatory Effects of Allocryptopine via the Target on the CX3CL1–CX3CR1 axis/GNB5/AKT/NF-κB/Apoptosis in Dextran Sulfate-Induced Mice
Source: MDPI journal article supplement (doi:10.3390/biomedicines11020464), 2023-02-05

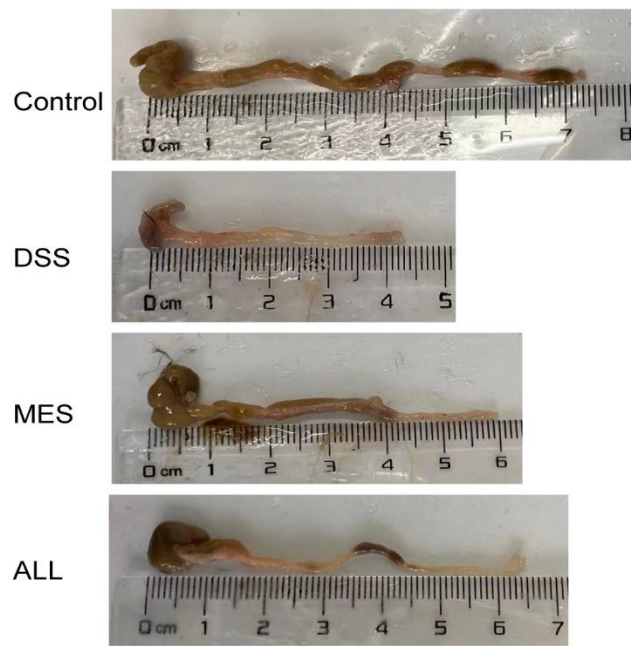

**Supplementary Figure S1.** ALL and MES improved the colon length of DSS-induced colitis in C57BL/6 mice.

Supplement: s1 [file s1]
